# Supplementary material for: An Automated Image Processing Module for Quality Evaluation of Milled Rice
Source: MDPI journal article supplement (doi:10.3390/foods12061273), 2023-03-16
Supplement: s1 [file s1]

**Supplementary Table S1.** Market price and number of grains of eight types of rice varieties

| <b>S. No.</b> | <b>Rice variety</b> | <b>Sample<br/>nomenclature</b> | <b>Market price<br/>(in INR Per kg)</b> | <b>Count of individual<br/>grain images</b> |
|---------------|---------------------|--------------------------------|-----------------------------------------|---------------------------------------------|
| 1             | Traditional Basmati | BM                             | 78.0                                    | 295                                         |
| 2             | Eco Kolam           | EK                             | 39.5                                    | 233                                         |
| 3             | HMT Kolam           | HK                             | 45.5                                    | 363                                         |
| 4             | Kana Basmati        | KB                             | 32.5                                    | 521                                         |
| 5             | Sona Masuri         | SM                             | 30.5                                    | 402                                         |
| 6             | Tibar Basmati       | TB                             | 61.5                                    | 431                                         |
| 7             | Tukda Basmati       | TKB                            | 44.5                                    | 398                                         |
| 8             | Wada Kolam          | WK                             | 48.5                                    | 438                                         |

**Supplementary Table S2.** Geometrical and morphological features of rice grains

| S. No. | Feature                          | Symbol          | Mathematical Expression     |
|--------|----------------------------------|-----------------|-----------------------------|
| 1      | Area                             | $A$             | -                           |
| 2      | Perimeter                        | $P$             | -                           |
| 3      | Area of bounding ellipse         | $A_{ellipse}$   | $(\pi/4)L_{major}L_{minor}$ |
| 4      | Length of major axis of ellipse  | $L_{major}$     | -                           |
| 5      | Length of minor axis of ellipse  | $L_{minor}$     | -                           |
| 6      | Eccentricity of bounding ellipse | $e$             | -                           |
| 7      | Aspect ratio                     | $AR$            | $L_{major}/L_{minor}$       |
| 8      | Area of bounding rectangle       | $A_{rectangle}$ | -                           |
| 9      | Area of convex hull              | $A_{hull}$      | -                           |
| 10     | Extent                           | $E$             | $A_{rectangle}/A$           |
| 11     | Solidity                         | $S$             | $A_{hull}/A$                |
| 12     | Roundness                        | $R$             | $4\pi A/P^2$                |
| 13     | Equivalent diameter              | $D_{eq}$        | $\sqrt{4A/\pi}$             |
| 14     | Compactness                      | $C$             | $D_{eq}/L_{major}$          |
| 15     | Shape factor 1                   | $SF_1$          | $L_{major}/A$               |
| 16     | Shape factor 2                   | $SF_2$          | $L_{minor}/A$               |
| 17     | Shape factor 3                   | $SF_3$          | $A/\pi L_{major}^2$         |
| 18     | Shape factor 4                   | $SF_4$          | $A/\pi L_{minor}L_{major}$  |

**Supplementary Table S3.** Summary of feature dataset

| Feature type                  | Symbol                                                                                         | Count |
|-------------------------------|------------------------------------------------------------------------------------------------|-------|
| Geometrical and morphological | Listed in Table 2                                                                              | 18    |
| Textural                      | $CORR_i, CON_i, DIS_i, ASM_i, EN_i, HO_i$ for $i \in [0^\circ, 45^\circ, 90^\circ, 135^\circ]$ | 24    |
| Color                         | $R_i, G_i, B_i, H_i, S_i, V_i$ where $i \in [0, 46]$                                           | 282   |

**Supplementary Table S4.** Number of actual versus the predicted grains in the validation samples

| Number of actual (A) and predicted (P) grains |          |    |          |    |          |    |          |    |
|-----------------------------------------------|----------|----|----------|----|----------|----|----------|----|
| Rice type                                     | Sample 1 |    | Sample 2 |    | Sample 3 |    | Sample 4 |    |
|                                               | A        | P  | A        | P  | A        | P  | A        | P  |
| <b>BM</b>                                     | 50       | 41 | 0        | 7  | 0        | 0  | 50       | 39 |
| <b>EK</b>                                     | 0        | 0  | 0        | 3  | 30       | 33 | 0        | 5  |
| <b>HK</b>                                     | 0        | 2  | 0        | 3  | 0        | 4  | 0        | 3  |
| <b>KB</b>                                     | 0        | 0  | 30       | 26 | 0        | 1  | 0        | 0  |
| <b>SM</b>                                     | 0        | 1  | 0        | 5  | 0        | 3  | 0        | 9  |
| <b>TB</b>                                     | 30       | 29 | 50       | 23 | 0        | 0  | 0        | 9  |
| <b>TKB</b>                                    | 0        | 3  | 0        | 5  | 0        | 0  | 30       | 8  |
| <b>WK</b>                                     | 0        | 0  | 0        | 0  | 50       | 38 | 0        | 2  |

**Supplementary Table S5.** Confusion matrix for the Random Forest classifier

|                 |     | True label |    |    |     |    |    |     |    |
|-----------------|-----|------------|----|----|-----|----|----|-----|----|
|                 |     | BM         | EK | HK | KB  | SM | TB | TKB | WK |
| Predicted label | BM  | 56         | 0  | 0  | 0   | 0  | 3  | 0   | 0  |
|                 | EK  | 0          | 33 | 3  | 0   | 4  | 0  | 8   | 4  |
|                 | HK  | 0          | 5  | 35 | 0   | 3  | 0  | 5   | 14 |
|                 | KB  | 0          | 0  | 0  | 109 | 3  | 0  | 3   | 1  |
|                 | SM  | 0          | 1  | 0  | 6   | 70 | 0  | 6   | 0  |
|                 | TB  | 7          | 0  | 3  | 0   | 2  | 47 | 4   | 0  |
|                 | TKB | 0          | 1  | 9  | 3   | 4  | 9  | 56  | 2  |
|                 | WK  | 0          | 2  | 9  | 2   | 3  | 0  | 1   | 62 |

BM, Basmati; EK, Eco Kolam; HK, HMT Kolam; KB, Kana Basmati; SM, Sona Masuri; TB, Tibar Basmati; TKB, Tukda Basmati; WK, Wada Kolam.

## Figure captions

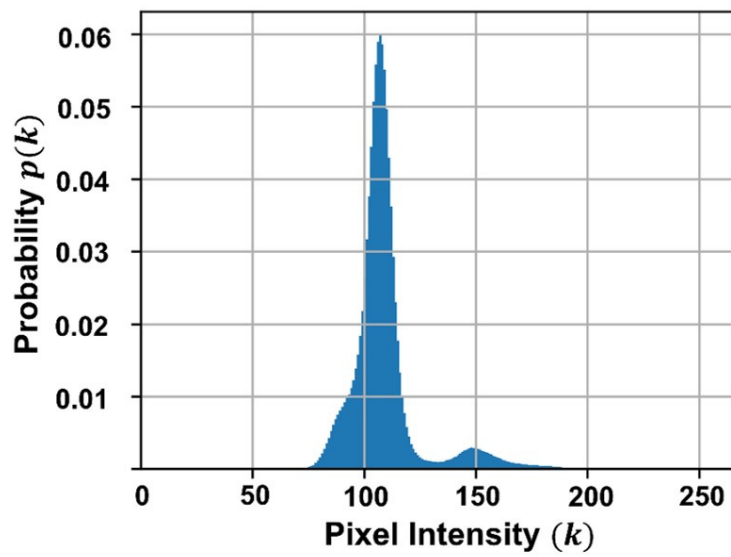

**Supplementary Figure S1.** The histogram for a representative gray scale image of rice grains.

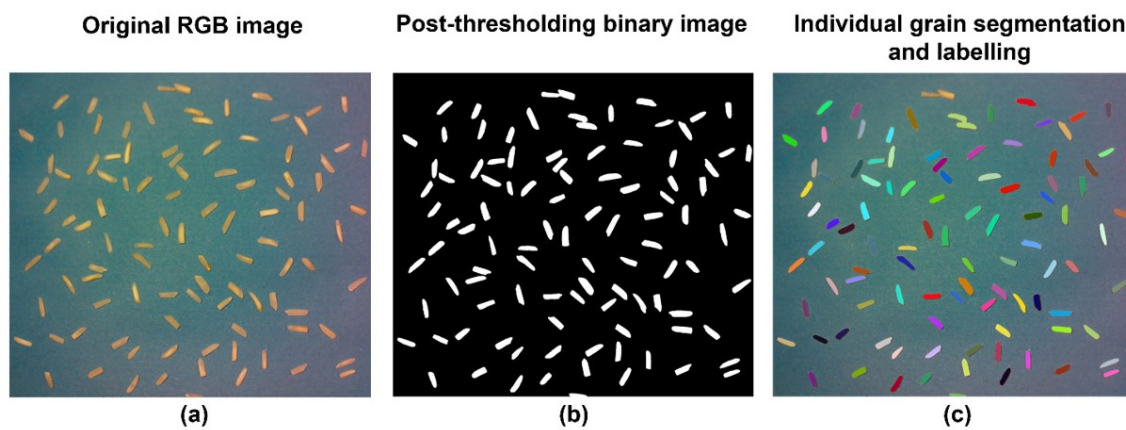

**Supplementary Figure S2.** Images of rice grains: (a) original RGB format, (b) gray scale format after global thresholding, and (c) individual labelled rice grains obtained using the Watershed algorithm.

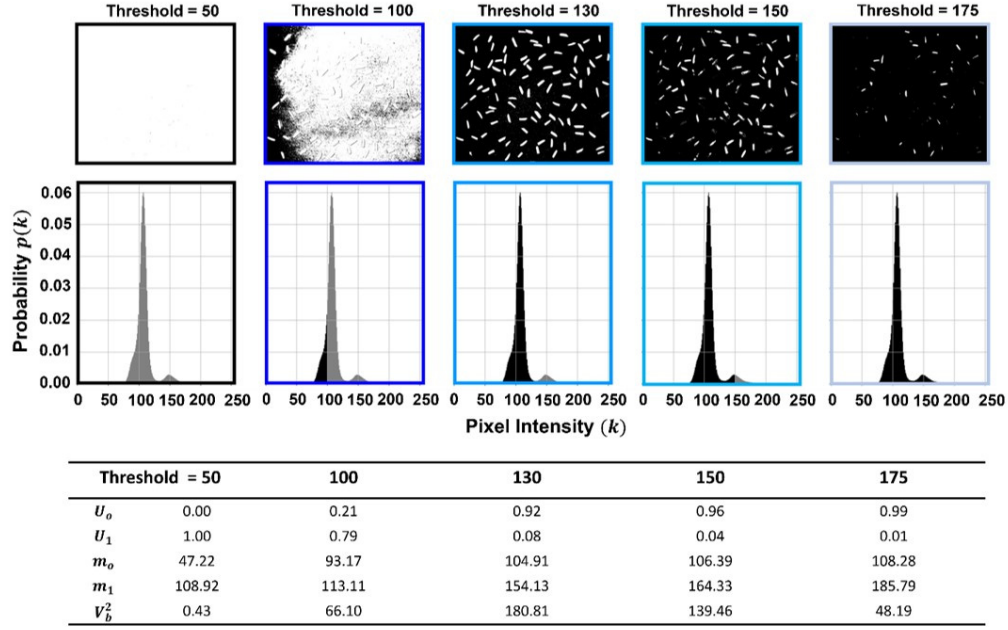

**Supplementary Figure S3.** Estimation of global threshold value using Otsu's technique: (Top) Grayscale images of rice grains at different levels of thresholding. The corresponding histograms are shown below each image. (Bottom) The parameters used for obtaining the threshold values are tabulated.

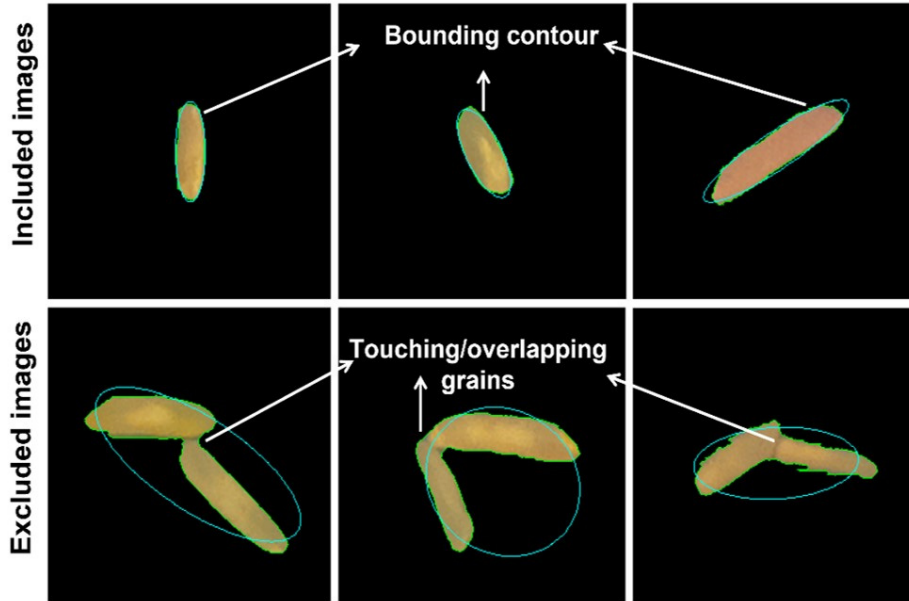

**Supplementary Figure S4.** Representative images of the segmented rice grains: (Top row) images of individual rice grains with bounding contours that were selected for image dataset. (Bottom row) images of rice grains that are overlapping/touching, and therefore, omitted from the dataset.

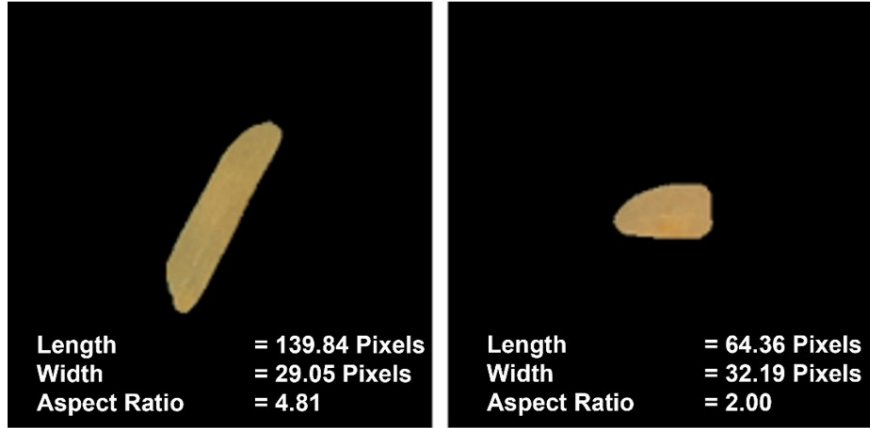

**Supplementary Figure S5.** Representative images showing selective geometrical features (length, width and aspect ratio) calculated for segmented rice grains.

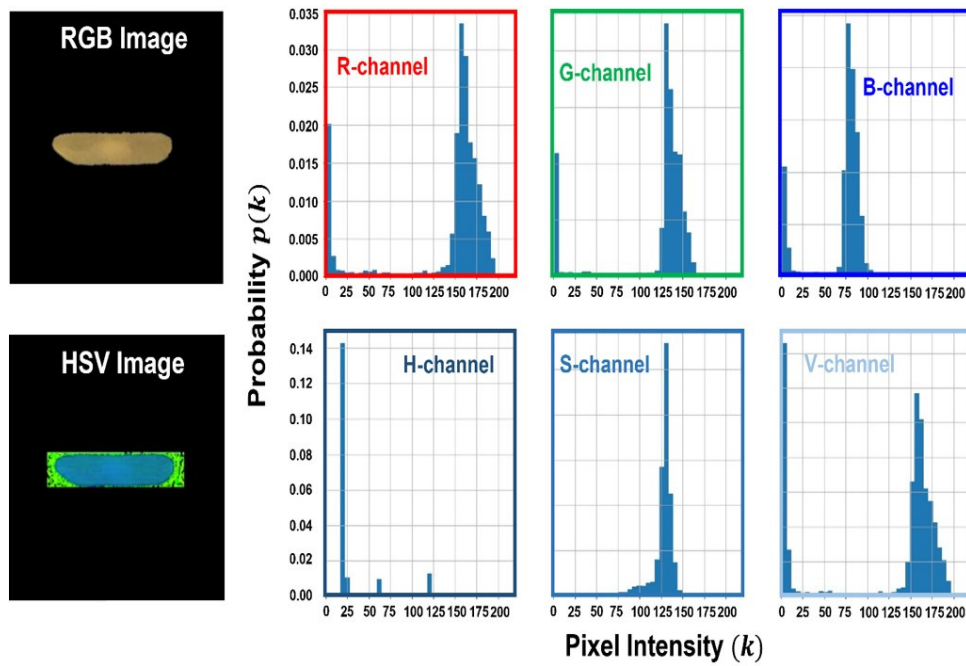

**Supplementary Figure S6.** (Left) RGB and HSV images of a segmented rice grain. (Right) histograms corresponding to the R, G, B channels (top row), and H, S, V channels (bottom row).

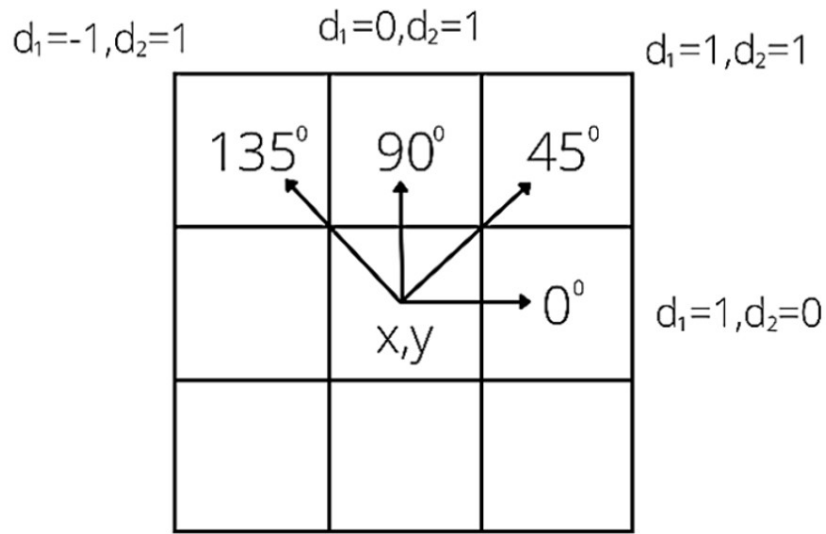

**Supplementary Figure S7.** Coordinate frame with the direction of analysis.

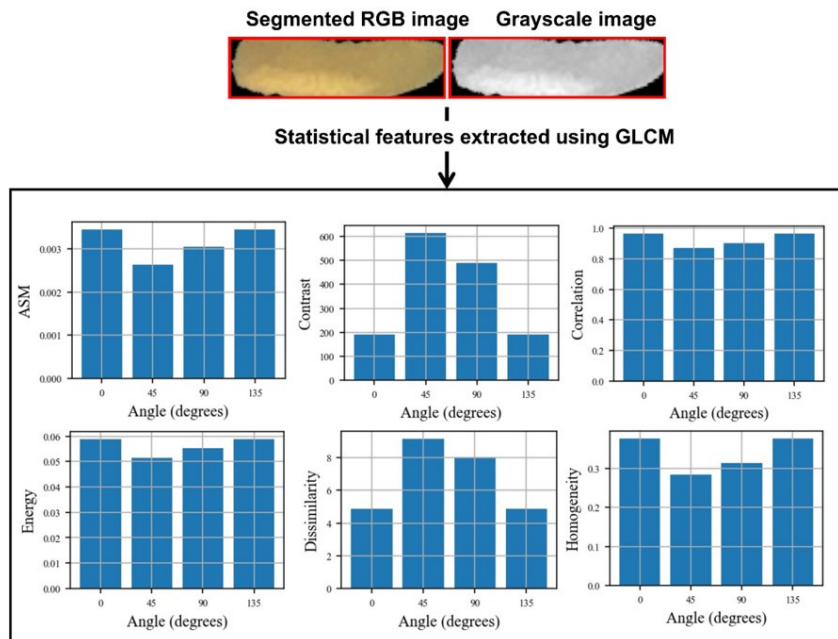

**Supplementary Figure S8.** Statistical features (ASM, Contrast, Correlation, Energy, Dissimilarity, and Homogeneity) extracted using the GLCM for a representative segmented rice grain image.



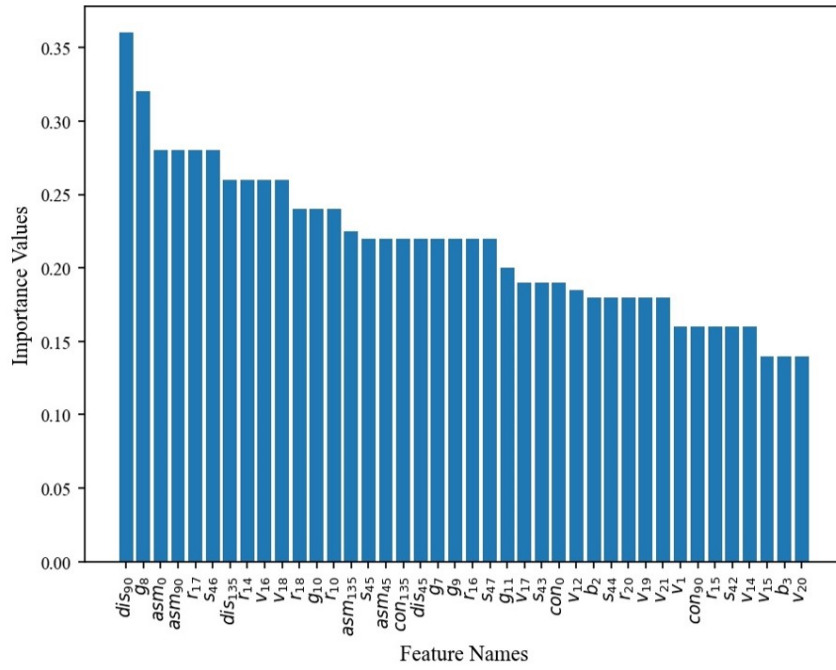

**Supplementary Figure S9.** Key features and their magnitude in terms of their importance value.

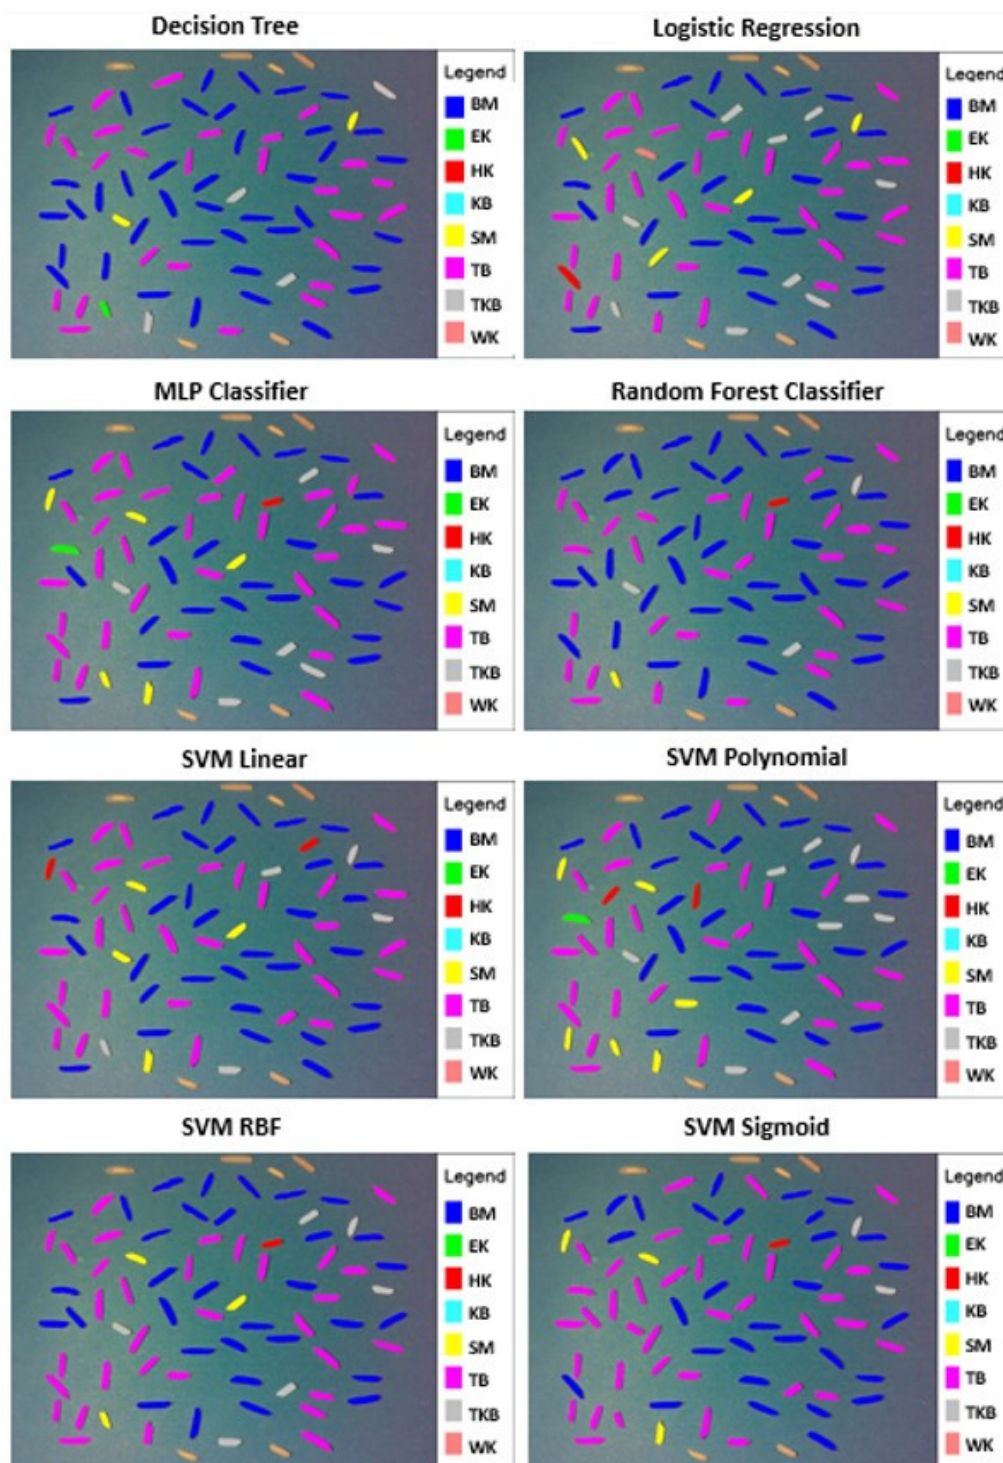

**Supplementary Figure S10.** Labelled rice grain images with different machine learning models, which shows a qualitative comparison between the models.
